# Supplementary material for: Silicone Composites with CNT/Graphene Hybrid Fillers: A Review
Source: MDPI journal article supplement (doi:10.3390/ma14092418), 2021-05-06
Supplement: s1 [file s1]

Supplementary

# Silicone Composites with CNT/Graphene Hybrid Fillers: A Review

Marie N. Barshutina <sup>1,4,\*</sup>, Valentyn S. Volkov <sup>1,\*</sup>, Aleksey V. Arsenin <sup>1</sup>, Albert G. Nasibulin <sup>2,3</sup>,  
Sergey N. Barshutin <sup>5</sup>, Alexey G. Tkachev <sup>4,5</sup>

<sup>1</sup> Center for Photonics and 2D Materials, Moscow Institute of Physics and Technology, Dolgoprudny 141700, Russia; arsenin.av@mipt.ru

<sup>2</sup> Skolkovo Institute of Science and Technology, Nobel Str. 3, Moscow 121205, Russia; a.nasibulin@skoltech.ru

<sup>3</sup> School of Chemical Engineering, Aalto University, P.O. Box 16100, Aalto 00076, Finland

<sup>4</sup> NanoTechCenter Ltd., Tambov 392000, Russia; postmaster@kma.tstu.ru

<sup>5</sup> Tambov State Technical University, Tambov 392000, Russia; barshutin.sn@tstu.ru

\* Correspondence: barshutina.mn@mipt.ru (M.N.B.), volkov.vs@mipt.ru (V.S.V.)

To assess the synergistic improvement in the parameters of CNT/G/PDMS composites, their values were compared with the theoretical ones ( $\alpha(t)$ ) calculated from the additive model:

$$\alpha(t) = \varphi_{CNT} \times \alpha(CNT/PDMS) + \varphi_G \times \alpha(G/PDMS) \quad (1)$$

wherein  $\varphi_{CNT}$  is the fraction of CNTs in hybrid filler;  $\varphi_G$  is the fraction of graphene in hybrid filler;  $\alpha_{CNT/PDMS}$  is an experimental value of the target parameter for CNT/PDMS composites at X% filler loading;  $\alpha_{G/PDMS}$  is an experimental value of the target parameter for G/PDMS composites at X% filler loading.

The total relative improvement was then found as

$$\delta = \frac{\alpha(exp) - \alpha(t)}{\alpha(t)} \times 100\% \quad (2)$$

wherein  $\alpha(exp)$  is an experimental value of the target parameter for CNT/G/PDMS composites at X% filler loading.

In this way, we calculated the synergistic improvement of tensile strength ( $\sigma_{ts}$ ), elongation at break ( $\varepsilon$ ), electrical conductivity ( $\sigma_e$ ), electric heating performance ( $h_{rc}$ ), thermal conductivity ( $\lambda$ ) using data from

Pradhan et al. [1]:

$$\begin{aligned} \delta(\sigma_{ts}) &= \frac{\sigma_{ts}(exp) - (\varphi_{CNT} \times \sigma_{ts}(CNT/PDMS) + \varphi_G \times \sigma_{ts}(G/PDMS))}{\varphi_{CNT} \times \sigma_{ts}(CNT/PDMS) + \varphi_G \times \sigma_{ts}(G/PDMS)} \\ &\times 100\% \end{aligned} \quad (3)$$

$$\delta(\sigma_{ts}) = \frac{0.67 - (0.5 \times 0.44 + 0.5 \times 0.37)}{0.5 \times 0.44 + 0.5 \times 0.37} \times 100\% \approx 65\% \quad (4)$$

$$\delta(\varepsilon) = \frac{\varepsilon(exp) - (\varphi_{CNT} \times \varepsilon(CNT/PDMS) + \varphi_G \times \varepsilon(G/PDMS))}{\varphi_{CNT} \times \varepsilon(CNT/PDMS) + \varphi_G \times \varepsilon(G/PDMS)} \times 100\% \quad (5)$$

$$\delta(\varepsilon) = \frac{194 - (0.5 \times 104 + 0.5 \times 90)}{0.5 \times 104 + 0.5 \times 90} \times 100\% = 100\% \quad (6)$$

Yan et al. [2]:

$$\delta(\sigma_e) = \frac{\sigma_e(\text{exp}) - (\varphi_{\text{CNT}} \times \sigma_e(\text{CNT/PDMS}) + \varphi_{\text{G}} \times \sigma_e(\text{G/PDMS}))}{\varphi_{\text{CNT}} \times \sigma_e(\text{CNT/PDMS}) + \varphi_{\text{G}} \times \sigma_e(\text{G/PDMS})} \times 100\% \quad (7)$$

$$\delta(\sigma_e) = \frac{1.37 - (0.9 \times 0.435 + 0.1 \times 0.161)}{0.9 \times 0.435 + 0.1 \times 0.161} \times 100\% \approx 236\% \quad (8)$$

$$\begin{aligned} &\delta(h_{\text{rc}}) \\ &= \frac{h_{\text{rc}}(\text{exp}) - (\varphi_{\text{CNT}} \times h_{\text{rc}}(\text{CNT/PDMS}) + \varphi_{\text{G}} \times h_{\text{rc}}(\text{G/PDMS}))}{\varphi_{\text{CNT}} \times h_{\text{rc}}(\text{CNT/PDMS}) + \varphi_{\text{G}} \times h_{\text{rc}}(\text{G/PDMS})} \times 100\% \end{aligned} \quad (9)$$

$$\delta(h_{\text{rc}}) = \frac{7.46 - (0.9 \times 5.79 + 0.1 \times 6.89)}{0.9 \times 5.79 + 0.1 \times 6.89} \times 100\% \approx 26\% \quad (10)$$

Chen et al. [3]:

$$\delta(\sigma_e) = \frac{\sigma_e(\text{exp}) - (\varphi_{\text{CNT}} \times \sigma_e(\text{CNT/PDMS}) + \varphi_{\text{G}} \times \sigma_e(\text{G/PDMS}))}{\varphi_{\text{CNT}} \times \sigma_e(\text{CNT/PDMS}) + \varphi_{\text{G}} \times \sigma_e(\text{G/PDMS})} \times 100\% \quad (11)$$

$$\delta(\sigma_e) = \frac{27 - (0.5 \times 0.07 + 0.5 \times 14)}{0.5 \times 0.07 + 0.5 \times 14} \times 100\% \approx 284\% \quad (12)$$

Sun et al. [4]:

$$\delta(\sigma_e) = \frac{\sigma_e(\text{exp (4.7\%)}) - (\sigma_e(\text{CNT(2\%)/PDMS}) + \sigma_e(\text{G(2.7\%)/PDMS}))}{\sigma_e(\text{CNT(2\%)/PDMS}) + \sigma_e(\text{G(2.7\%)/PDMS})} \times 100\% \quad (13)$$

$$\delta(\sigma_e) = \frac{3150 - (73 + 674)}{73 + 674} \times 100\% \approx 322\% \quad (14)$$

## References

1. Pradhan, B.; Srivastava, S. Synergistic effect of three-dimensional multi-walled carbon nanotube-graphene nanofiller in enhancing the mechanical and thermal properties of high-performance silicone rubber. *Polym. Int.* **2014**, *63*, 1219–1228.
2. Yan, J.; Jeong, Y.G. Synergistic effect of hybrid carbon fillers on electric heating behavior of flexible polydimethylsiloxane-based composite films. *Compos. Sci. Technol.* **2015**, *106*, 134–140.
3. Chen, M.; Zhang, L.; Duan, S.; Jing, S.; Jiang, H.; Li, C. Highly stretchable conductors integrated with a conductive carbon nanotube/graphene network and 3D porous poly(dimethylsiloxane). *Adv. Funct. Mater.* **2014**, *24*, 7548–7556.
4. Sun, X.; Liu, X.; Shen, X.; Wu, Y.; Wang, Z.; Kim, J. Reprint of graphene foam/carbon nanotube/poly(dimethyl siloxane) composites for exceptional microwave shielding. *Compos. Part A Appl. Sci. Manuf.* **2017**, *92*, 190–197.
